# Supplementary material for: Characterization of Immunoactive and Immunotolerant CD4+ T Cells in Breast Cancer by Measuring Activity of Signaling Pathways That Determine Immune Cell Function
Source: MDPI journal article supplement (doi:10.3390/cancers14030490), 2022-01-19
Supplement: s1 [file s1]

## SUPPLEMENTARY INFORMATION

| sample category                        | annotation per sample | FOXO | NFκB | JAK-STAT1/2 | JAK-STAT3 | TGFβ  | Notch | ER    | WNT   |
|----------------------------------------|-----------------------|------|------|-------------|-----------|-------|-------|-------|-------|
| CD4+ T cells from peripheral blood     | donor 1               | 4.5  | 4.5  | -8.3        | -5.7      | -13.9 | -8.9  | -18.7 | -19.1 |
|                                        | donor 2               | 1.3  | 1.4  | -7.6        | -10.2     | -16.8 | -9.6  | -19.1 | -21.0 |
|                                        | donor 3               | -3.2 | -7.1 | -7.6        | -8.4      | -20.3 | -8.9  | -18.9 | -24.5 |
|                                        | donor 4               | -2.1 | -5.7 | -6.1        | -9.8      | -19.0 | -9.3  | -18.9 | -21.4 |
|                                        | patient 1             | 8.5  | 17.4 | -7.4        | -2.4      | -5.0  | 1.6   | -16.0 | -20.0 |
|                                        | patient 2             | -1.6 | -1.5 | -7.7        | -7.3      | -14.5 | -5.7  | -18.6 | -16.7 |
|                                        | patient 3             | 5.9  | 6.3  | -8.7        | -5.5      | -14.7 | -8.7  | -18.8 | -22.8 |
|                                        | patient 4             | -3.8 | -5.1 | -5.6        | -6.2      | -19.6 | -6.1  | -18.6 | -21.1 |
|                                        | patient 5             | 2.4  | 8.4  | -8.7        | -4.3      | -11.7 | -4.2  | -18.2 | -15.9 |
|                                        | patient 6             | 1.7  | 5.9  | -7.2        | -6.3      | -13.2 | -8.4  | -18.8 | -21.2 |
|                                        | patient 7             | 6.9  | 3.2  | -8.3        | -5.8      | -14.3 | -7.3  | -18.9 | -19.2 |
|                                        | patient 8             | 1.3  | 5.2  | -9.3        | -6.7      | -14.9 | -6.8  | -18.7 | -17.0 |
|                                        | patient 9             | -2.5 | -1.3 | -4.2        | -8.1      | -18.4 | -8.0  | -19.9 | -22.2 |
|                                        | patient 10            | -2.2 | -3.6 | -6.2        | -7.3      | -18.8 | -8.4  | -19.3 | -21.8 |
| CD4+ T cells from axillary lymph nodes | patient 1             | -1.4 | 13.1 | -9.0        | -6.7      | -12.3 | -2.2  | -18.8 | -22.7 |
|                                        | patient 2             | 2.5  | 11.0 | -8.3        | -2.9      | -11.5 | 0.8   | -17.5 | -20.8 |
|                                        | patient 3             | 5.5  | 17.8 | -8.6        | -4.5      | -12.2 | 0.3   | -18.2 | -20.5 |
|                                        | patient 4             | 0.8  | 10.1 | -8.2        | -4.8      | -11.7 | -3.0  | -18.2 | -21.7 |
|                                        | patient 5             | 4.2  | 7.4  | -6.6        | -7.4      | -13.2 | -5.4  | -18.7 | -20.7 |
|                                        | patient 6             | -3.5 | -2.1 | -10.5       | -4.6      | -15.6 | -8.3  | -19.9 | -23.4 |
|                                        | patient 7             | 2.1  | 12.4 | -9.0        | -3.1      | -10.4 | -3.3  | -18.2 | -20.3 |
|                                        | patient 8             | 0.6  | 7.2  | -9.4        | -4.8      | -14.6 | -5.1  | -18.7 | -26.9 |
|                                        | patient 9             | -4.0 | 5.6  | -5.7        | -5.2      | -17.2 | -8.6  | -19.1 | -25.0 |
|                                        | patient 10            | 2.3  | 2.9  | -8.1        | -3.0      | -14.3 | -4.0  | -19.1 | -21.9 |
| CD4+ T cells from breast tumor         | patient 1             | 5.6  | 21.5 | -6.3        | -3.9      | -7.5  | 6.3   | -18.5 | -21.5 |
|                                        | patient 2             | 6.9  | 26.8 | 0.5         | 1.2       | -6.8  | 2.5   | -15.9 | -17.5 |
|                                        | patient 3             | 10.9 | 30.3 | -1.2        | 0.9       | -2.4  | 9.3   | -16.9 | -15.3 |
|                                        | patient 4             | 0.9  | 23.5 | 0.9         | 0.3       | -8.5  | 1.5   | -15.7 | -19.9 |
|                                        | patient 5             | 7.2  | 31.3 | -4.0        | 5.4       | -4.8  | 7.0   | -6.7  | -14.2 |
|                                        | patient 6             | 9.6  | 19.0 | -9.8        | -3.3      | -10.4 | 4.0   | -19.3 | -16.6 |
|                                        | patient 7             | 5.4  | 22.8 | -1.3        | 0.4       | -9.0  | 5.6   | -18.3 | -13.5 |
|                                        | patient 8             | 3.2  | 13.6 | -4.5        | -3.2      | -8.3  | 5.2   | -17.5 | -25.4 |
|                                        | patient 9             | -1.9 | 18.1 | -3.4        | -4.2      | -14.2 | -1.3  | -17.6 | -25.0 |
|                                        | patient 10            | 14.5 | 24.8 | -2.2        | 1.3       | -7.4  | 9.3   | -18.2 | -19.1 |

Supplementary Figure S1. Signaling pathway activities per patient from dataset GSE36765 [19].

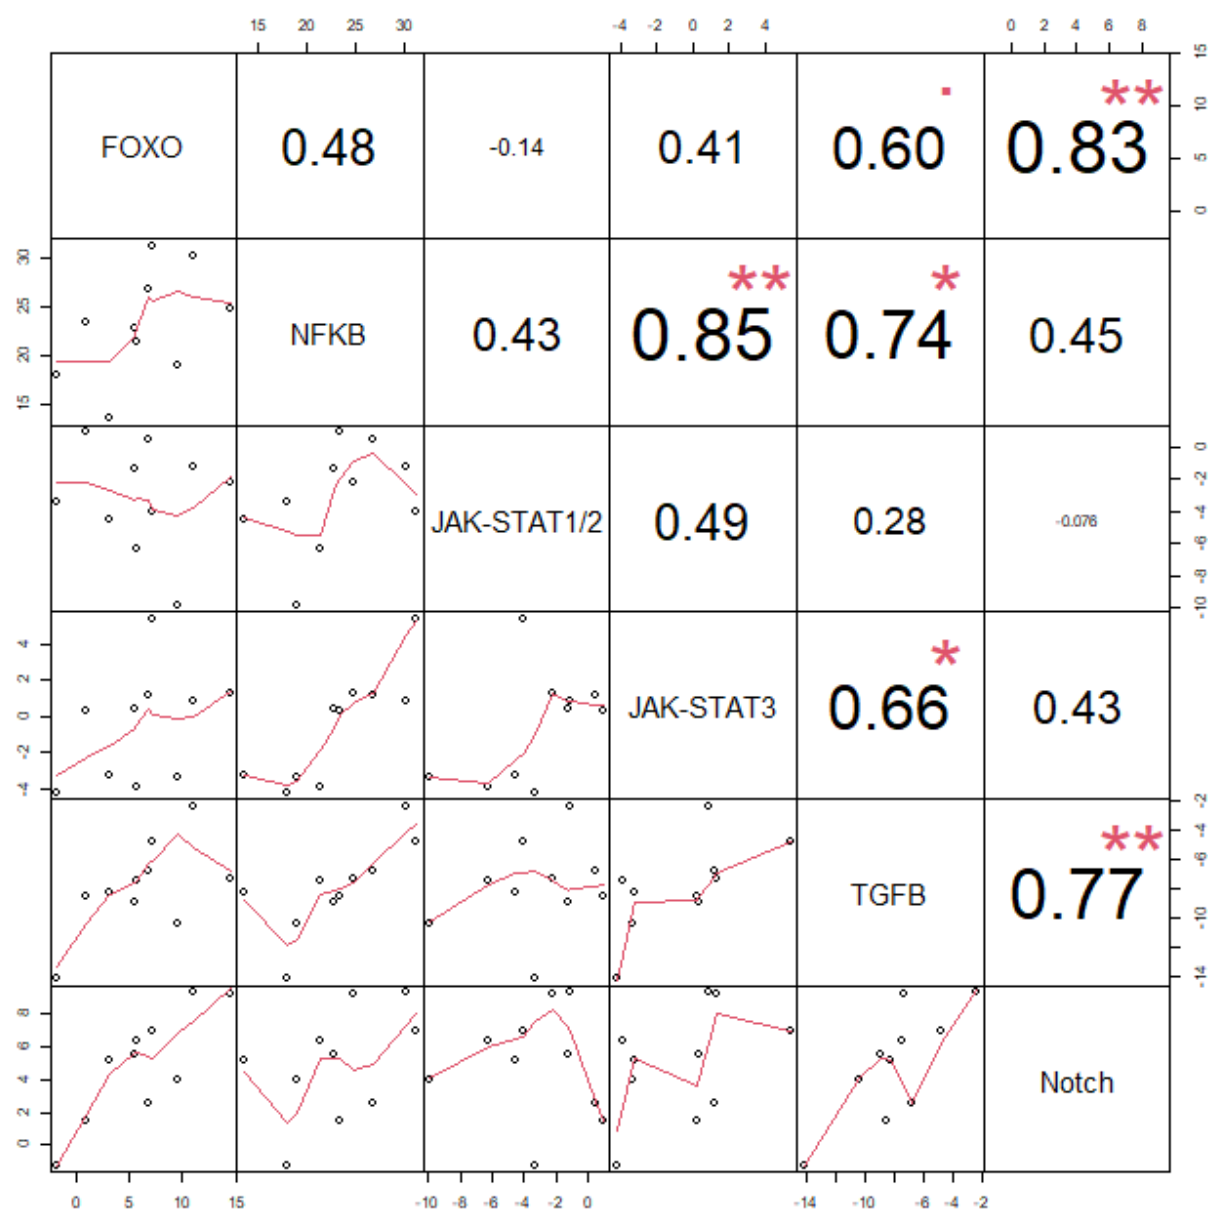

Supplementary Figure S2. NFkB pathway activity is highly correlated with JAK-STAT3 and TGFB pathway activity.

Correlation matrix between signaling pathway activities among BrCa TIL samples from dataset GSE36765 [19]. Bottom graphs show bivariate scatterplots with a fitted line and on top are the corresponding Pearson correlation coefficients, including stars for statistically significant correlations.

### Treg cells

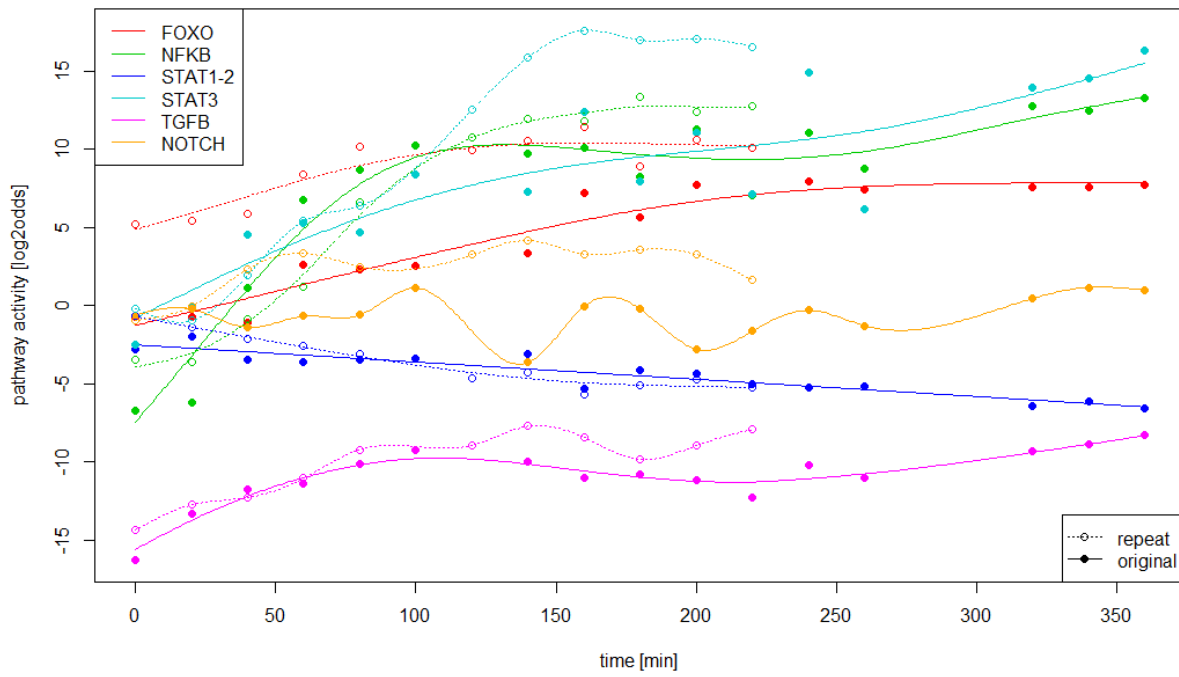

A

### Teff cells

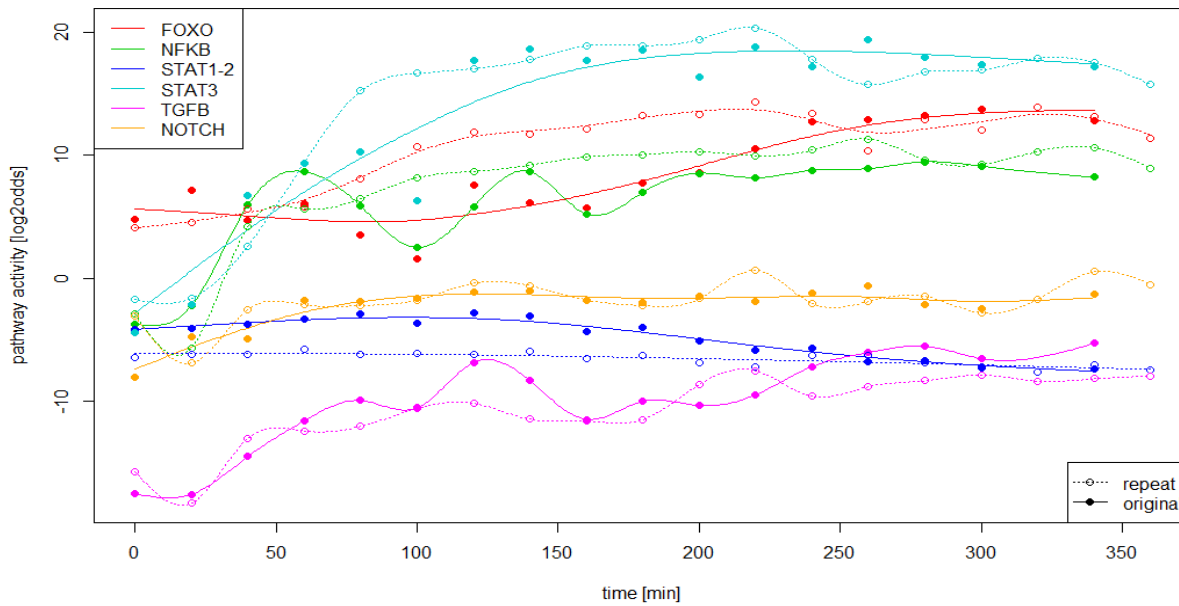

B

| array     | title                       | QC.passed | QC.man.<br>passed | t   | log2dds<br>NOTCH | log2dds<br>JAK-STAT3 | log2dds<br>NFkB | log2dds<br>JAK-<br>STAT1/2 | log2dds<br>TGFB | QC.man.comments                                                         |
|-----------|-----------------------------|-----------|-------------------|-----|------------------|----------------------|-----------------|----------------------------|-----------------|-------------------------------------------------------------------------|
| GSM285027 | Human_Treg_T0min            | TRUE      | TRUE              | 0   | -0.6             | -2.5                 | -6.7            | -6.3                       | -16.3           |                                                                         |
| GSM723815 | Human_Treg_repeated_T0min   | FALSE     | TRUE              | 0   | -0.9             | -0.2                 | -3.4            | -4.0                       | -14.3           | samprep probably not performed                                          |
| GSM285028 | Human_Treg_T20min           | FALSE     | TRUE              | 20  | -0.2             | -0.1                 | -6.2            | -5.9                       | -13.3           | hybspike probably not performed                                         |
| GSM723816 | Human_Treg_repeated_T20min  | TRUE      | TRUE              | 20  | 0.0              | -1.0                 | -3.6            | -4.9                       | -12.7           |                                                                         |
| GSM285029 | Human_Treg_T40min           | FALSE     | TRUE              | 40  | -1.4             | 4.5                  | 1.1             | -6.6                       | -11.7           | samprep and hybspike probably not performed                             |
| GSM723817 | Human_Treg_repeated_T40min  | TRUE      | TRUE              | 40  | 2.3              | 1.9                  | -0.9            | -5.4                       | -12.3           |                                                                         |
| GSM285030 | Human_Treg_repeated_T60min  | FALSE     | TRUE              | 60  | -0.7             | 5.3                  | 6.8             | -5.7                       | -11.4           | hybspike probably not performed                                         |
| GSM723818 | Human_Treg_repeated_T60min  | TRUE      | TRUE              | 60  | 3.3              | 5.4                  | 1.2             | -5.7                       | -11.0           |                                                                         |
| GSM285031 | Human_Treg_T80min           | FALSE     | TRUE              | 80  | -0.6             | 4.7                  | 8.6             | -5.3                       | -10.1           | gapdh a bit higher but .mid value OK (1.00)                             |
| GSM723819 | Human_Treg_repeated_T80min  | TRUE      | TRUE              | 80  | 2.5              | 6.4                  | 6.6             | -5.7                       | -9.2            |                                                                         |
| GSM285032 | Human_Treg_T100min          | FALSE     | TRUE              | 100 | 1.1              | 8.4                  | 10.2            | -5.6                       | -9.3            | samprep probably not performed; hybspike OK                             |
| GSM723820 | Human_Treg_repeated_T100min | FALSE     | FALSE             | 100 |                  |                      |                 |                            |                 | SET TO FALSE! bactin (4.00), gapdh (2.60) and gapdh.mid (1.74) too high |
| GSM723821 | Human_Treg_repeated_T120min | TRUE      | TRUE              | 120 | 3.2              | 12.5                 | 10.8            | -5.4                       | -8.9            |                                                                         |
| GSM285033 | Human_Treg_T140min          | FALSE     | TRUE              | 140 | -3.6             | 7.3                  | 9.7             | -4.8                       | -10.0           | gapdh a bit higher but .mid value OK (1.05)                             |
| GSM723822 | Human_Treg_repeated_T140min | TRUE      | TRUE              | 140 | 4.2              | 15.8                 | 11.9            | -6.3                       | -7.7            |                                                                         |
| GSM285034 | Human_Treg_repeated_T160min | FALSE     | TRUE              | 160 | -0.1             | 12.4                 | 10.1            | -6.9                       | -11.0           | samprep and hybspike probably not performed                             |
| GSM723823 | Human_Treg_repeated_T160min | FALSE     | TRUE              | 160 | 3.3              | 17.6                 | 11.8            | -6.8                       | -8.4            | samprep probably not performed                                          |
| GSM285035 | Human_Treg_T180min          | FALSE     | TRUE              | 180 | -0.2             | 7.9                  | 8.2             | -5.1                       | -10.8           | hybspike probably not performed                                         |
| GSM723824 | Human_Treg_repeated_T180min | TRUE      | TRUE              | 180 | 3.6              | 17.0                 | 13.3            | -6.6                       | -9.8            |                                                                         |
| GSM285036 | Human_Treg_T200min          | FALSE     | TRUE              | 200 | -2.8             | 11.1                 | 11.3            | -6.2                       | -11.1           | hybspike probably not performed                                         |
| GSM723825 | Human_Treg_repeated_T200min | TRUE      | TRUE              | 200 | 3.3              | 17.1                 | 12.4            | -6.1                       | -8.9            |                                                                         |
| GSM285037 | Human_Treg_T220min          | FALSE     | TRUE              | 220 | -1.6             | 7.1                  | 7.1             | -5.5                       | -12.3           | samprep probably not performed                                          |
| GSM723826 | Human_Treg_repeated_T220min | TRUE      | TRUE              | 220 | 1.6              | 16.6                 | 12.7            | -6.1                       | -7.9            |                                                                         |
| GSM285038 | Human_Treg_T240min          | FALSE     | TRUE              | 240 | -0.3             | 14.9                 | 11.0            | -7.1                       | -10.2           | samprep probably not performed                                          |
| GSM723827 | Human_Treg_repeated_T240min | FALSE     | FALSE             | 240 |                  |                      |                 |                            |                 | SET TO FALSE! bactin (5.18), gapdh (2.73) and gapdh.mid (1.83) too high |
| GSM285039 | Human_Treg_T260min          | FALSE     | TRUE              | 260 | -1.3             | 6.1                  | 8.7             | -6.2                       | -11.0           | samprep and hybspike probably not performed                             |
| GSM723828 | Human_Treg_repeated_T260min | FALSE     | FALSE             | 260 |                  |                      |                 |                            |                 | bactin (5.46), gapdh (3.09) and gapdh.mid (2.04) too high               |
| GSM285040 | Human_Treg_T280min          | FALSE     | FALSE             | 280 |                  |                      |                 |                            |                 | bactin.mid too high (3.27)                                              |
| GSM723829 | Human_Treg_repeated_T280min | FALSE     | FALSE             | 280 |                  |                      |                 |                            |                 | bactin (5.09), gapdh (2.73) and gapdh.mid (1.76) too high               |
| GSM285041 | Human_Treg_T300min          | FALSE     | FALSE             | 300 |                  |                      |                 |                            |                 | bactin (4.89) and bactin.mid (3.28) too high; failure of 6 ref genes    |
| GSM723830 | Human_Treg_repeated_T300min | FALSE     | FALSE             | 300 |                  |                      |                 |                            |                 | SET TO FALSE! bactin (5.13), gapdh (2.51) and gapdh.mid (1.63) too high |
| GSM285042 | Human_Treg_T320min          | TRUE      | TRUE              | 320 | 0.4              | 14.0                 | 12.8            | -7.2                       | -9.3            |                                                                         |
| GSM723831 | Human_Treg_repeated_T320min | FALSE     | FALSE             | 320 |                  |                      |                 |                            |                 | bactin (5.11), gapdh (2.96) and gapdh.mid (2.18) too high               |
| GSM285043 | Human_Treg_T340min          | FALSE     | TRUE              | 340 | 1.2              | 14.5                 | 12.5            | -7.3                       | -8.9            | samprep and hybspike probably not performed                             |
| GSM723832 | Human_Treg_repeated_T340min | FALSE     | FALSE             | 340 |                  |                      |                 |                            |                 | bactin (4.98), gapdh (2.46) and gapdh.mid (1.54) too high               |
| GSM285044 | Human_Treg_T360min          | FALSE     | TRUE              | 360 | 1.0              | 16.3                 | 13.2            | -8.3                       | -8.3            | samprep probably not performed                                          |
| GSM723833 | Human_Treg_repeated_T360min | FALSE     | FALSE             | 360 |                  |                      |                 |                            |                 | SET TO FALSE! bactin (4.98), gapdh (2.49) and gapdh.mid (1.59) too high |

Supplementary Figure S3. GSE11292. Pathway analysis scores for resting and activated Treg (A) and T effector (B) cells. C: QC analysis of individual sample data. Treg and T effector cells were activated in the same manner with anti-CD3/CD28 and IL2. Samples were taken every 20 minutes. N=2 time experiments (defined as "original" and "repeated") [24]. Sample data that failed our QC as described in Methods were not included in the pathway analysis. Pathway activity scores are on log2odds scale.

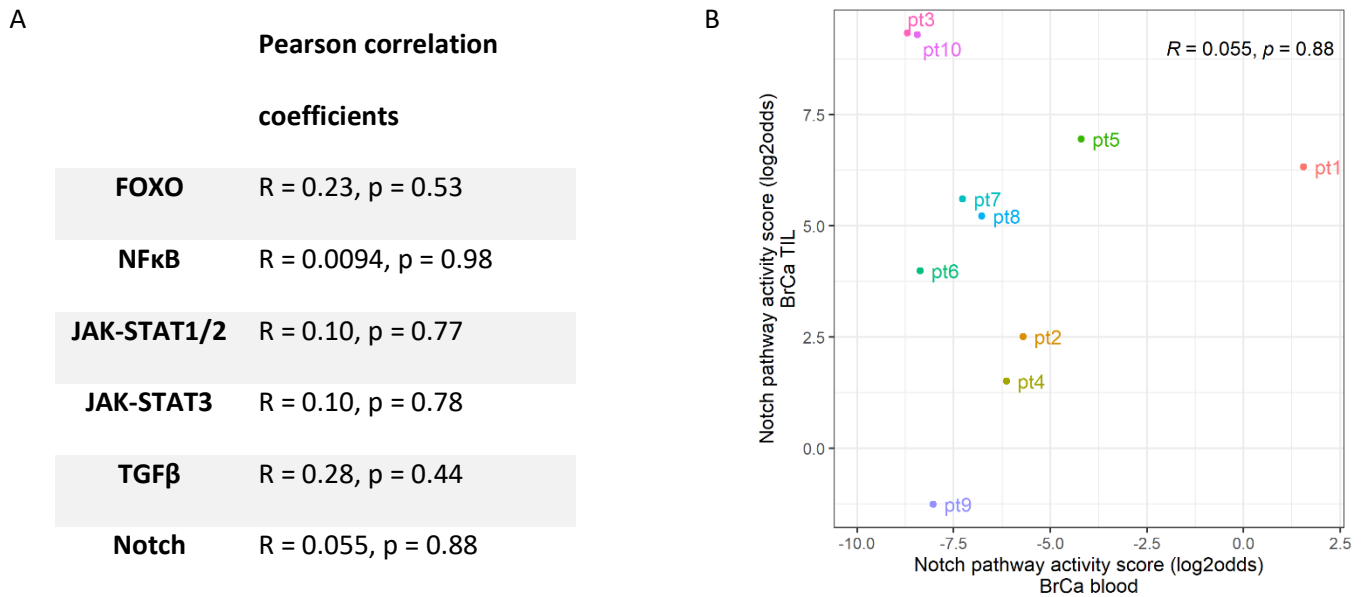

Supplementary Figure S4. Correlation between signaling pathway activities in CD4 T+ cells from blood and from TIL from BrCa patients (dataset GSE36765, [19]). A. Pearson correlation coefficients; B. Correlation plot for the Notch pathway.

Supplementary Table S1. Threshold values above which signaling pathway activity may be considered abnormally high. Thresholds are calculated based on activity in CD4+ T cells in blood from the four healthy donors in the GSE36765 dataset [19] and are defined as the mean pathway activity score  $\pm$  two standard deviations.

|                    | lower threshold | upper threshold | # patients exceeding the upper threshold |
|--------------------|-----------------|-----------------|------------------------------------------|
| <b>FOXO</b>        | -6.9            | 7.2             | 1 (pt 1)                                 |
| <b>NFκB</b>        | -12.8           | 9.4             | 1 (pt 1)                                 |
| <b>JAK-STAT1/2</b> | -9.2            | -5.5            | 1 (pt 9)                                 |
| <b>JAK-STAT3</b>   | -12.6           | -4.4            | 2 (pt 1, 5)                              |
| <b>TGFβ</b>        | -23.1           | -11.9           | 2 (pt 1, 5)                              |
| <b>Notch</b>       | -9.8            | -8.5            | 9 (pt 1-2, 4-10)                         |
